# Supplementary material
Source: PubMed Central journal article supplement (PMC8320707)

### Supplementary Figure 3

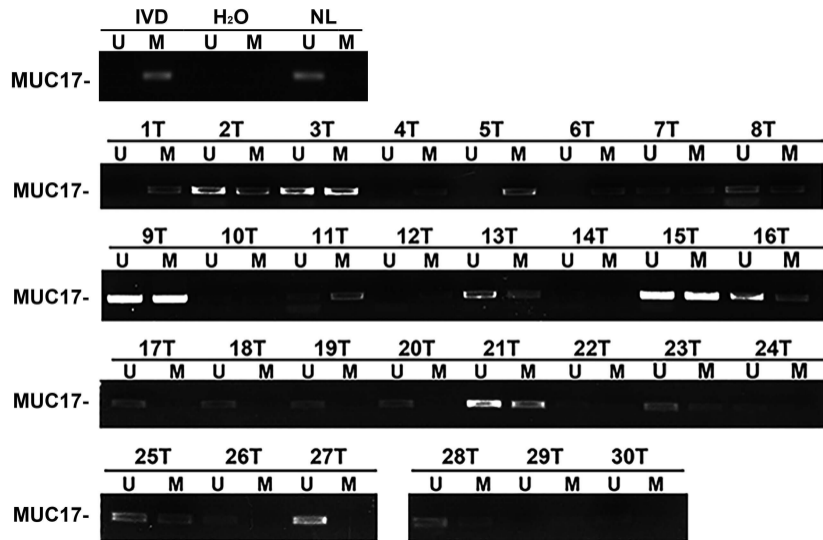

Supplement: NIHMS1716235-supplement-Supple_fig_3.pdf [file NIHMS1716235-supplement-Supple_fig_3.pdf]

# Supplementary Figure 6

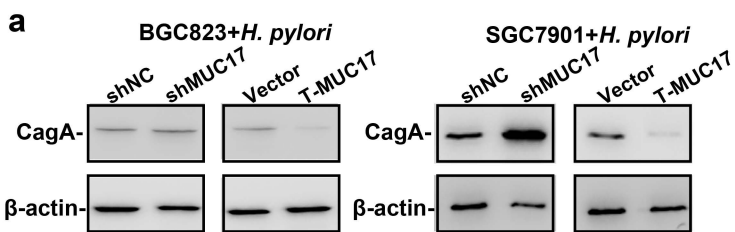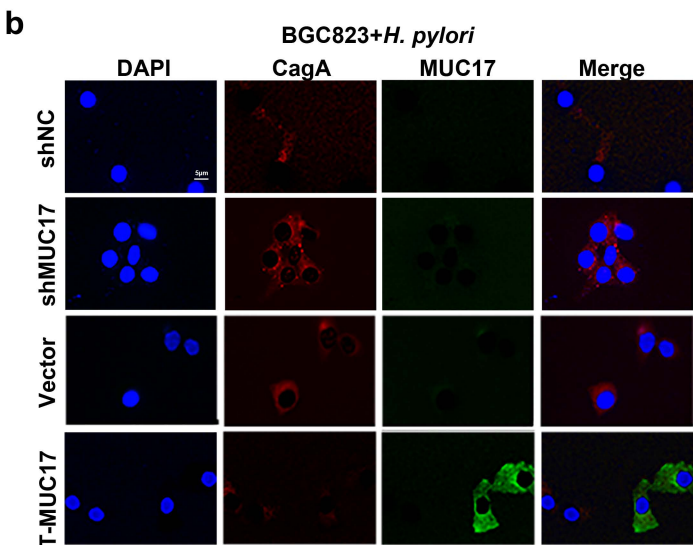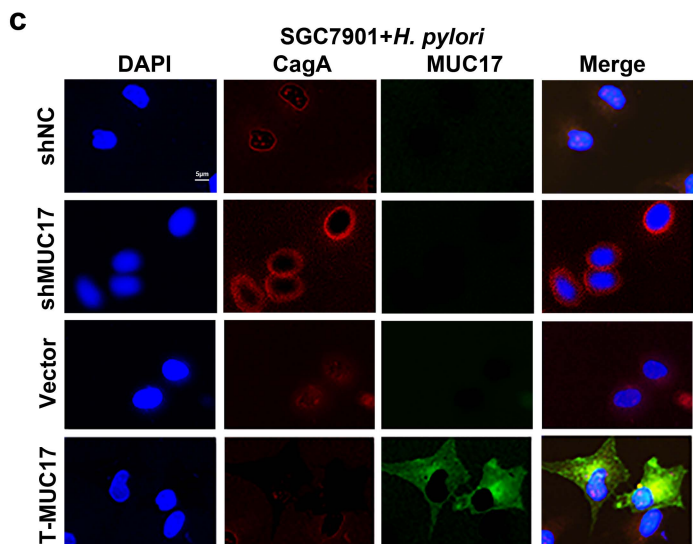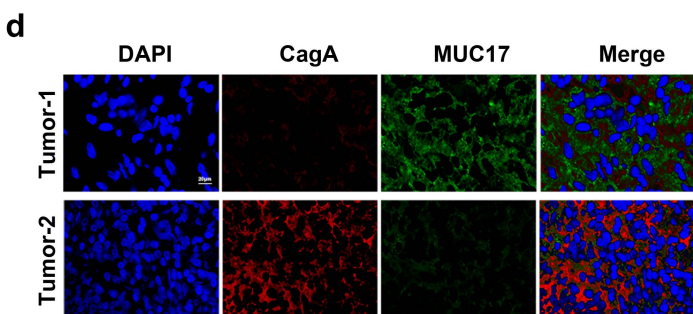

Supplement: NIHMS1716235-supplement-Supple_fig_6.pdf [file NIHMS1716235-supplement-Supple_fig_6.pdf]

## Supplementary Figure 8

### ChIP qPCR Primer ( P1~P2 )

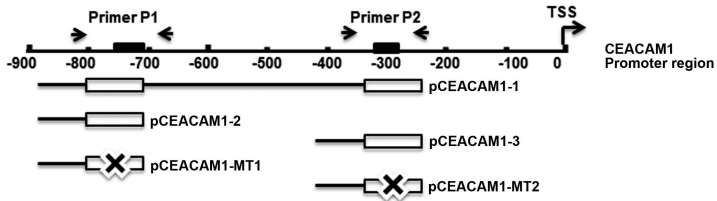

Supplement: NIHMS1716235-supplement-Supple_fig_8.pdf [file NIHMS1716235-supplement-Supple_fig_8.pdf]
